# Supplementary material for: Störung der Mikrozirkulation bei COVID-19
Source: Springer Nature journal article supplement (doi:10.1007/s00063-021-00842-z), 2021-08-10
Supplement: MOESM1 [file 19558902]

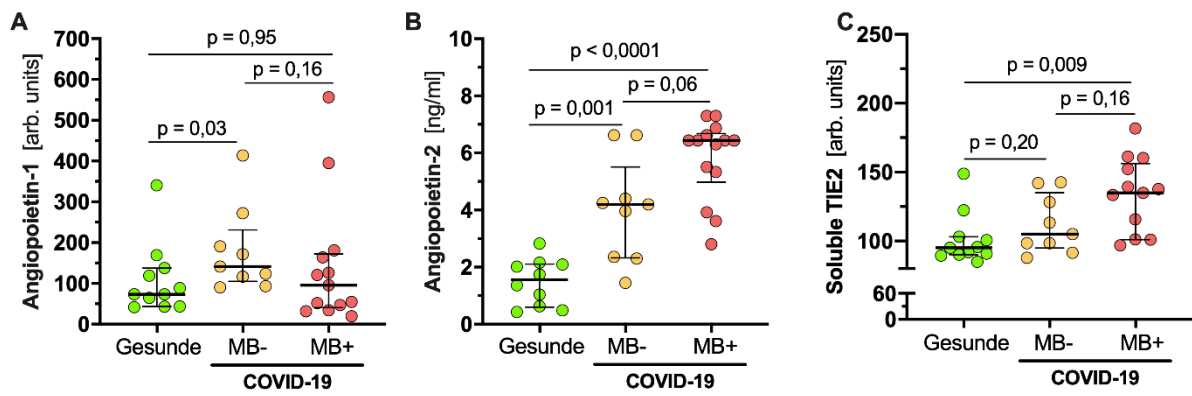

Boxplots von a) Angiotensin-1, b) Angiotensin-2, c) löslichem Tie2-Rezeptor zwischen gesunden Kontrollen und COVID-19-Patienten mit (rot) und ohne (orange) mechanische Beatmung (MB). Mod. nach [5]
